# Supplementary material for: Linkage mapping of Barley yellow dwarf virus resistance in connected populations of maize
Source: PubMed Central journal article supplement (PMC4329211; doi:10.1186/s12870-015-0420-x), 2015-02-03
Supplement: 12870_2015_420_MOESM1_ESM.pdf [file 12870_2015_420_MOESM1_ESM.pdf]

1 Linkage mapping of *Barley yellow dwarf virus* resistance  
2 in connected populations of maize

3 Frederike Horn<sup>1</sup>, Antje Habekuß<sup>2</sup> and Benjamin Stich<sup>1\*</sup>

4

5

6 <sup>1</sup>Max Planck Institute for Plant Breeding Research, Carl-von-Linné-Weg 10, 50829

7 Cologne, Germany

8 <sup>2</sup>Julius Kuehn-Institute, Erwin-Baur-Str. 27, 06484 Quedlinburg, Germany

9

10 BMC Plant Biology

## ADDITIONAL FILES

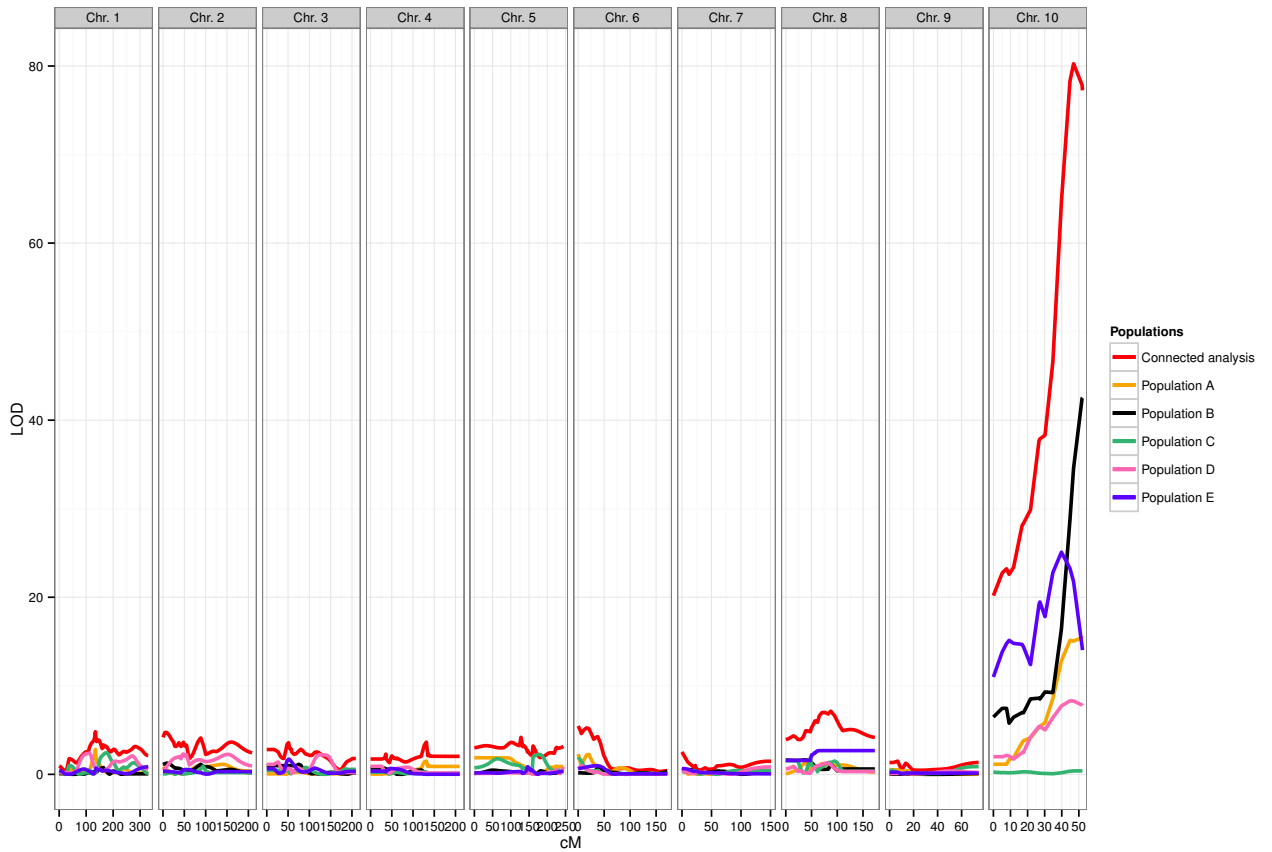

**Figure S1** QTL for the trait infection rate (IR) across the genome in the inoculated field experiment.

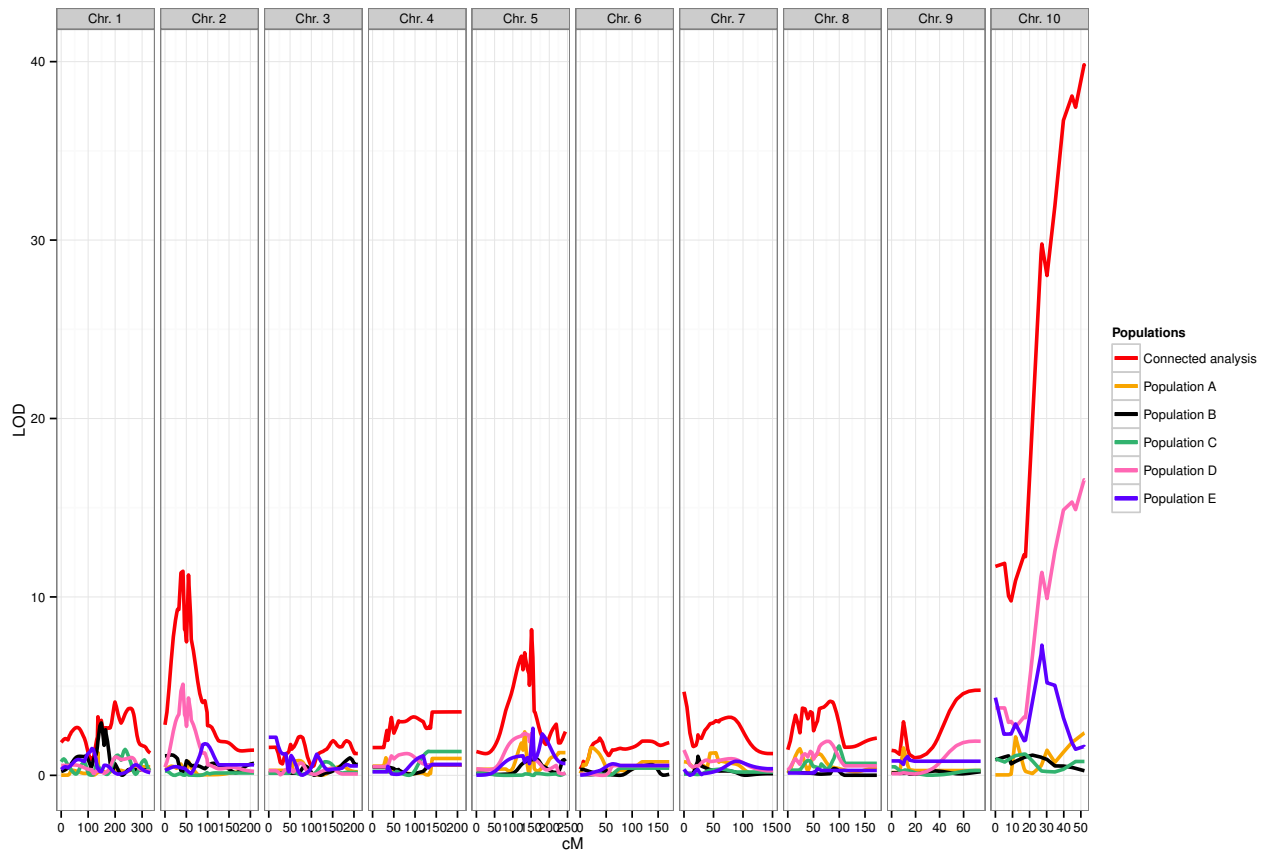

**Figure S2** QTL for the trait red edges (RE) across the genome in the inoculated field experiment.

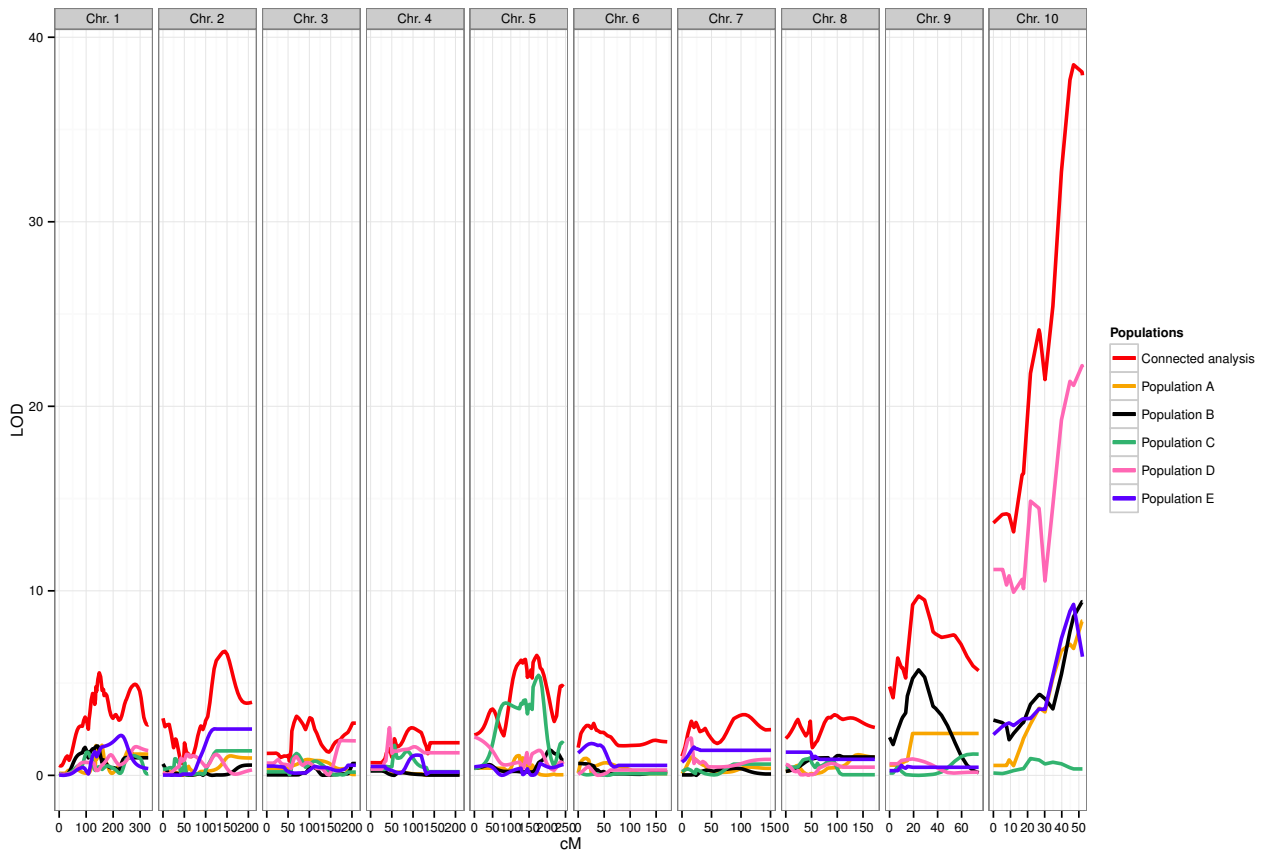

**Figure S3** QTL for the trait infection rate (IR) across the genome in the greenhouse experiment.
